# Supplementary material for: Tracing Carbon Sources through Aquatic and Terrestrial Food Webs Using Amino Acid Stable Isotope Fingerprinting
Source: PubMed Central journal article supplement (PMC3775739; doi:10.1371/journal.pone.0073441), 2013-09-17
Supplement: pone.0073441.s010.pdf [file pone.0073441.s010.pdf]

## Supporting Information Appendix S1

Input data (mean  $\pm$  standard deviation) of the California mussel (*Mytilus californianus*) for the FRUITS mixing model.

Consumer values:

|               | $\delta^{13}\text{C}_{\text{Val}}$ | $\delta^{13}\text{C}_{\text{Leu}}$ | $\delta^{13}\text{C}_{\text{Lys}}$ |
|---------------|------------------------------------|------------------------------------|------------------------------------|
| Mussels (n=2) | -5.53 $\pm$ 0.12                   | -7.43 $\pm$ 0.11                   | 3.15 $\pm$ 0.43                    |

Food isotope values:

|                   | $\delta^{13}\text{C}_{\text{Val}}$ | $\delta^{13}\text{C}_{\text{Leu}}$ | $\delta^{13}\text{C}_{\text{Lys}}$ |
|-------------------|------------------------------------|------------------------------------|------------------------------------|
| Macrocystis (n=5) | -4.31 $\pm$ 0.63                   | -8.60 $\pm$ 0.73                   | 3.02 $\pm$ 0.46                    |
| Microalgae (n=27) | -4.87 $\pm$ 1.33                   | -7.76 $\pm$ 1.85                   | 2.67 $\pm$ 1.03                    |
| Bacteria (n=12)   | -2.37 $\pm$ 1.35                   | -0.76 $\pm$ 1.14                   | 0.82 $\pm$ 1.18                    |

Food biochemical composition (relative proportions):

|                        | Val             | Leu             | Lys             |
|------------------------|-----------------|-----------------|-----------------|
| Macrocystis (n=1) [8]* | 0.42 $\pm$ 0.04 | 0.35 $\pm$ 0.03 | 0.24 $\pm$ 0.02 |
| Microalgae (n=14) [9]  | 0.31 $\pm$ 0.01 | 0.40 $\pm$ 0.02 | 0.29 $\pm$ 0.02 |
| Bacteria (n=63) [10]   | 0.34 $\pm$ 0.07 | 0.39 $\pm$ 0.11 | 0.27 $\pm$ 0.13 |

\*Composition derived from one sample; hence, the standard deviation was set to an arbitrary value of 10% of the mean.

Prior information for ranking the most likely food sources was derived from the linear discriminant function analysis (Figure 5c):

[Microalgae]>[Bacteria]  
 [Microalgae]>[Macrocystis]  
 [Macrocystis]>[Bacteria]

Output data (relative proportions; mean, standard deviation (Stdev), 2.5, 50 and 97.5 percentiles (pc)) from the FRUITS mixing model.

Estimates on food intake:

|             | Mean | Stdev | 2.5 pc | 50 pc | 97.5 pc |
|-------------|------|-------|--------|-------|---------|
| Macrocystis | 0.26 | 0.11  | 0.05   | 0.26  | 0.46    |
| Microalgae  | 0.66 | 0.13  | 0.45   | 0.65  | 0.93    |
| Bacteria    | 0.08 | 0.06  | 0.00   | 0.06  | 0.20    |

Estimates on fraction contribution:

| Amino acid | Mean | Stdev | 2.5 pc | 50 pc | 97.5 pc |
|------------|------|-------|--------|-------|---------|
| Val        | 0.34 | 0.02  | 0.30   | 0.34  | 0.37    |
| Leu        | 0.39 | 0.02  | 0.36   | 0.39  | 0.42    |
| Lys        | 0.28 | 0.02  | 0.24   | 0.28  | 0.31    |

Estimates on food contribution:

| Proxy                              | Food        | Mean | Stdev | 2.5 pc | 50 pc | 97.5 pc |
|------------------------------------|-------------|------|-------|--------|-------|---------|
| $\delta^{13}\text{C}_{\text{Val}}$ | Macrocystis | 0.32 | 0.13  | 0.07   | 0.32  | 0.54    |
|                                    | Microalgae  | 0.61 | 0.14  | 0.39   | 0.60  | 0.91    |
|                                    | Bacteria    | 0.07 | 0.06  | 0.00   | 0.06  | 0.21    |
| $\delta^{13}\text{C}_{\text{Leu}}$ | Macrocystis | 0.24 | 0.11  | 0.04   | 0.23  | 0.43    |
|                                    | Microalgae  | 0.69 | 0.13  | 0.47   | 0.68  | 0.94    |
|                                    | Bacteria    | 0.07 | 0.06  | 0.00   | 0.06  | 0.21    |
| $\delta^{13}\text{C}_{\text{Lys}}$ | Macrocystis | 0.23 | 0.11  | 0.04   | 0.22  | 0.42    |
|                                    | Microalgae  | 0.70 | 0.13  | 0.49   | 0.69  | 0.94    |
|                                    | Bacteria    | 0.07 | 0.06  | 0.00   | 0.05  | 0.23    |

Appendix S1 (continued).

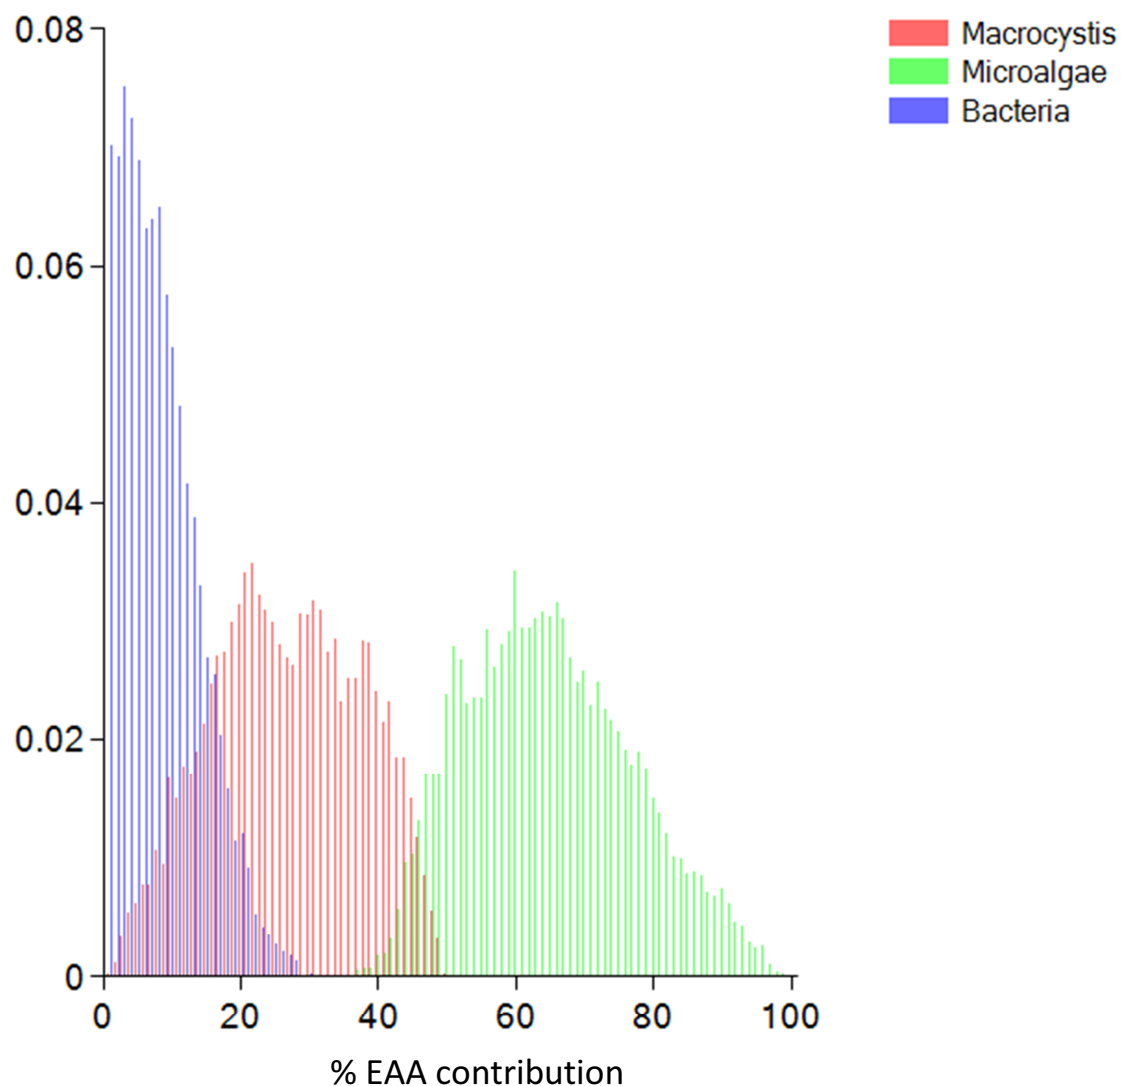

Plot of probability distributions generated with the FRUITS mixing model. The model display the distribution of three potential food sources for the California mussel based on  $\delta^{13}\text{C}$  values and relative composition of the essential amino acids (EAA); Val, Leu and Lys.

**Appendix S1 references**

1. Mateus H, Regenstein JM, Baker RC (1976) The amino acid composition of the marine brown alga *Macrocystis pyrifera* from Baja California, Mexico. *Botanica Marina*. pp. 155-156.
2. Brown MR (1991) The amino-acid and sugar composition of 16 species of microalgae used in mariculture. *Journal of Experimental Marine Biology and Ecology* 145: 79-99.
3. Simon M, Azam F (1989) Protein content and protein synthesis rates of planktonic marine bacteria. *Marine Ecology Progress Series* 51: 201-213.
