# Supplementary material for: Tracing Carbon Sources through Aquatic and Terrestrial Food Webs Using Amino Acid Stable Isotope Fingerprinting
Source: PLOS journal article supplement (doi:10.1371/journal.pone.0073441), 2013-09-17

### Supporting Figure S1

GC-C-IRMS chromatogram of the diatom *Amphora coffaeiformis* with the ratio of 45 to 44 voltages over time in the upper panel and voltage (mV) over time of ion masses 44 and 45, the most abundant CO<sub>2</sub> ion forms, in the lower panel.

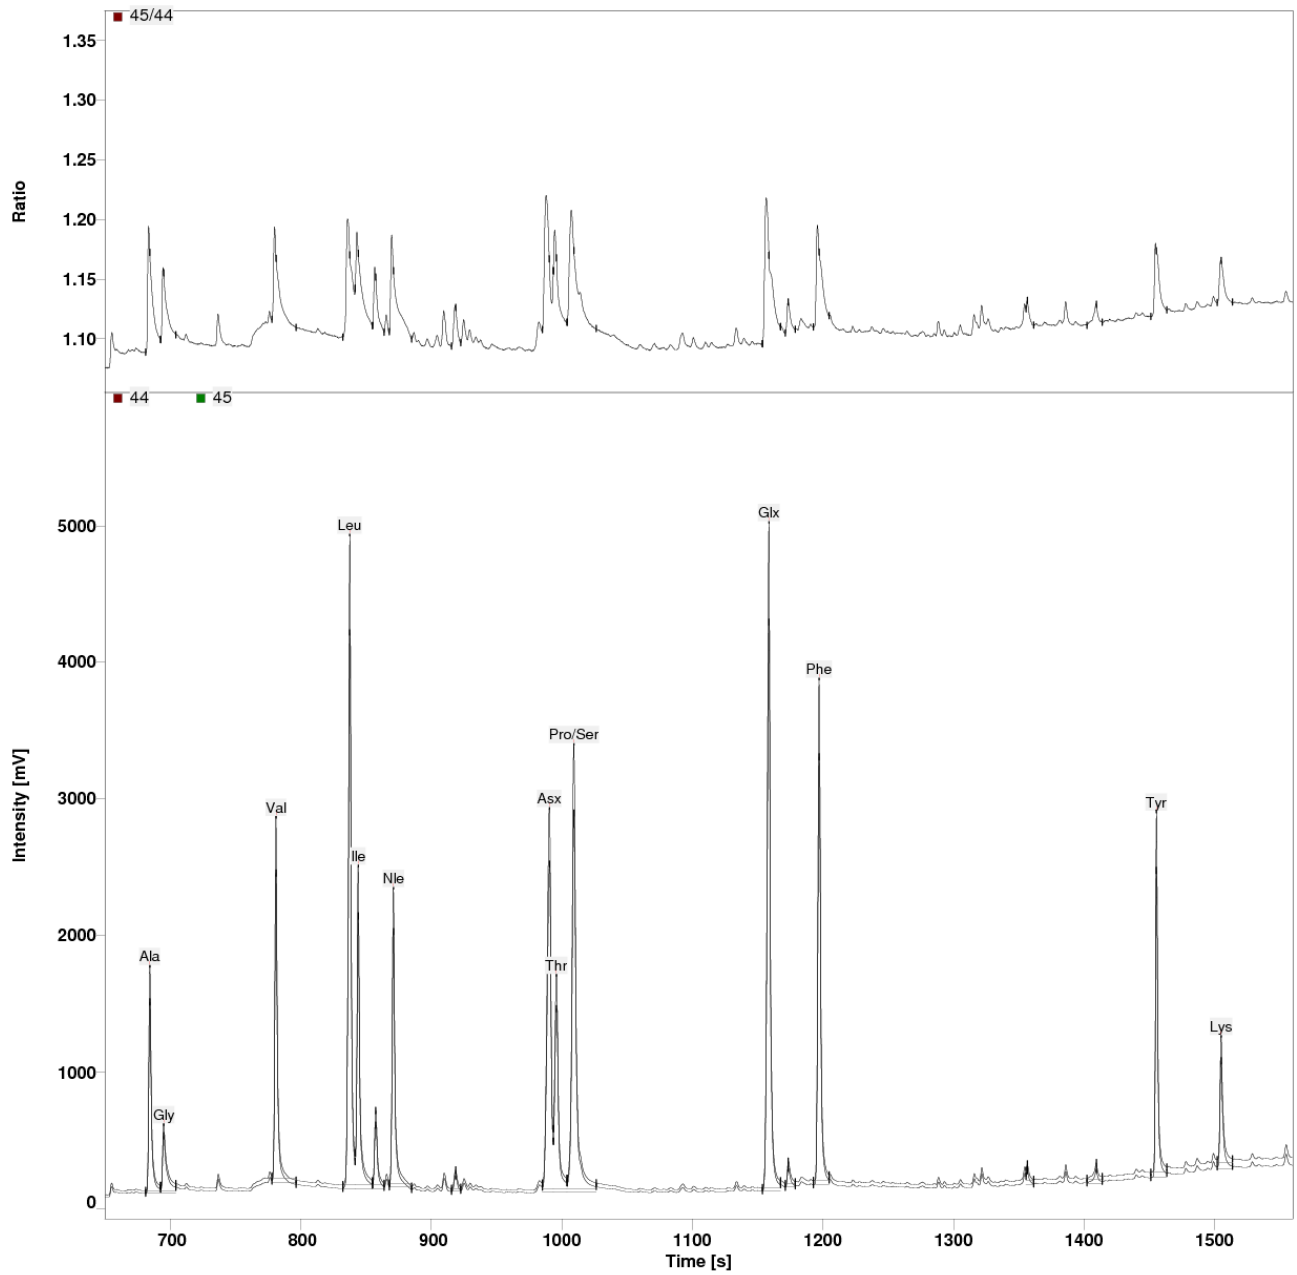

Supplement: S1 (10.1371/journal.pone.0073441.s001) [file journal.pone.0073441.s001]
